# Supplementary material for: Effect of lutein supplementation on blood lipids and advanced glycation end products in adults with central obesity: a double-blind randomized controlled trial
Source: Royal Society of Chemistry journal article supplement (doi:10.1039/d4fo05578k), 2025-01-01
Supplement: d4fo05578k1.pdf [file d4fo05578k1.pdf]

**Effect of lutein supplementation on blood lipids and advanced glycation end products in adults with central obesity : A double-blind randomized controlled trial**

Juan Zhou<sup>1,2,3#</sup>, Shanshan Wang<sup>1,2,3#</sup>, Qiang Wang<sup>1,2,3</sup>, Rui Zhao<sup>1,2,3</sup>, Dongxia Wang<sup>1,2,3</sup>, Huihui Xie<sup>1,2,3</sup>, Yatan Du<sup>1,2,3</sup>, Yue Xu<sup>1,2,3</sup>, Jin Deng<sup>1,2,3</sup>, Yue Huang<sup>1,2,3</sup>, Yuanhua Liu<sup>4</sup>, Xiaolin Peng<sup>5\*</sup>, Liping Hao<sup>1,2,3\*</sup>, Liegang Liu<sup>1,2,3</sup>

<sup>1</sup>Department of Nutrition and Food Hygiene. School of Public Health, Tongji Medical College, Huazhong University of Science and Technology, Wuhan, China

<sup>2</sup>Hubei Key Laboratory of Food Nutrition and Safety, School of Public Health, Tongji Medical College, Huazhong University of Science and Technology, Wuhan, China

<sup>3</sup>Ministry of Education Key Lab of Environment and Health, School of Public Health, Tongji Medical College, Huazhong University of Science and Technology, Wuhan, China

<sup>4</sup>Department of Nutrition, School of Public Health, Sun Yat-sen University, Guangzhou, Guangdong Province, China.

<sup>5</sup>Department of Oncology, Injury Prevention and Nutrition, Shenzhen Nanshan Center for Chronic Disease Control, Shenzhen, China.

**\*Corresponding author:** Liping Hao, 13 Hangkong Road, Wuhan 430030, China. Tel.: +86 27 8369 2711. Fax: +86 27 8369 3307. E-mail: haolp@mails.tjmu.edu.cn.

Xiaolin Peng, E-mail: xiaolinpeng@hotmail.com.

**Table S1** Changes in dietary intake of nutrients in subjects at baseline and the end of intervention.

| Nutrients                 | Lutein (n=47)  |                |              | Placebo (n=47) |                |               | Between groups (PP) <sup>†</sup> |                |
|---------------------------|----------------|----------------|--------------|----------------|----------------|---------------|----------------------------------|----------------|
|                           | Baseline       | Week 32        | Change       | Baseline       | Week 32        | Change        | Change                           | <i>P</i> value |
| Energy (kcal)             | 1673.0 ± 475.2 | 1713.2 ± 504.8 | 40.2 ± 380.8 | 1594.1 ± 449.5 | 1687.0 ± 470.7 | 92.9 ± 307.0* | -35.1 (-172, 101)                | 0.610          |
| Carbohydrate (g)          | 226.4 ± 73.5   | 221.5 ± 65.9   | -4.8 ± 51.0  | 220.6 ± 57.1   | 225.7 ± 60.6   | 5.1 ± 52.9    | -7.9 (-27.2, 11.3)               | 0.414          |
| Carbohydrate (E%)         | 54.0 ± 7.4     | 52.2 ± 7.7     | -1.8 ± 7.7   | 56.2 ± 7.3     | 54.1 ± 7.2     | -2.0 ± 8.9    | -1.1 (-4.04, 1.75)               | 0.435          |
| Protein (g)               | 50.8 ± 17.4    | 56.0 ± 18.7    | 5.3 ± 14.2*  | 51.2 ± 15.8    | 56.7 ± 18.0    | 5.5 ± 12.9*   | -0.4 (-5.7, 5.03)                | 0.896          |
| Protein (E%)              | 12.1 ± 1.6     | 13.0 ± 1.6     | 1.0 ± 1.9*   | 12.9 ± 1.9     | 13.4 ± 1.9     | 0.5 ± 2.5     | -0.1 (-0.9, 0.6)                 | 0.663          |
| Fat (g)                   | 61.6 ± 20.5    | 64.8 ± 25.4    | 3.1 ± 24.8   | 54.5 ± 22.9    | 60.7 ± 23.8    | 6.2 ± 20.7*   | -0.2 (-8.9, 8.6)                 | 0.970          |
| Fat (E%)                  | 33.4 ± 7.4     | 33.5 ± 6.8     | 0.1 ± 8.3    | 30.0 ± 6.9     | 31.8 ± 6.3     | 1.8 ± 8.6     | 0.9 (-1.8, 3.7)                  | 0.491          |
| Lutein intake (mg/d)      | 4.4 ± 3.4      | 7.3 ± 6.2      | 2.8 ± 7.1*   | 4.3 ± 3.2      | 6.0 ± 5.3      | 1.7 ± 5.0*    | 1.3 (-1.1, 3.6)                  | 0.286          |
| Carotenoids intake (mg/d) | 11.2 ± 5.1     | 14.2 ± 7.9     | 2.9 ± 8.8*   | 11.1 ± 6.6     | 11.6 ± 7.4     | 0.5 ± 8.9     | 2.5 (-0.6, 5.6)                  | 0.114          |

Data are expressed as the means ± SD or mean (95%CI).

\* Differences of within-groups after the intervention were assessed by paired t-test,  $P < 0.05$ .

<sup>†</sup>Participants with complete baseline and 32-week data were included in the PP analysis ( $n = 94$ ). Treatment difference and  $P$  value were obtained from a one-factor ANCOVA with baseline value as covariate.
